# Supplementary material for: Hypoxia-inducible factor expression is related to apoptosis and cartilage degradation in temporomandibular joint osteoarthritis
Source: PubMed Central journal article supplement (PMC9202126; doi:10.1186/s12891-022-05544-x), 2022-06-16
Supplement: 12891_2022_5544_MOESM1_ESM.pdf [file 12891_2022_5544_MOESM1_ESM.pdf]

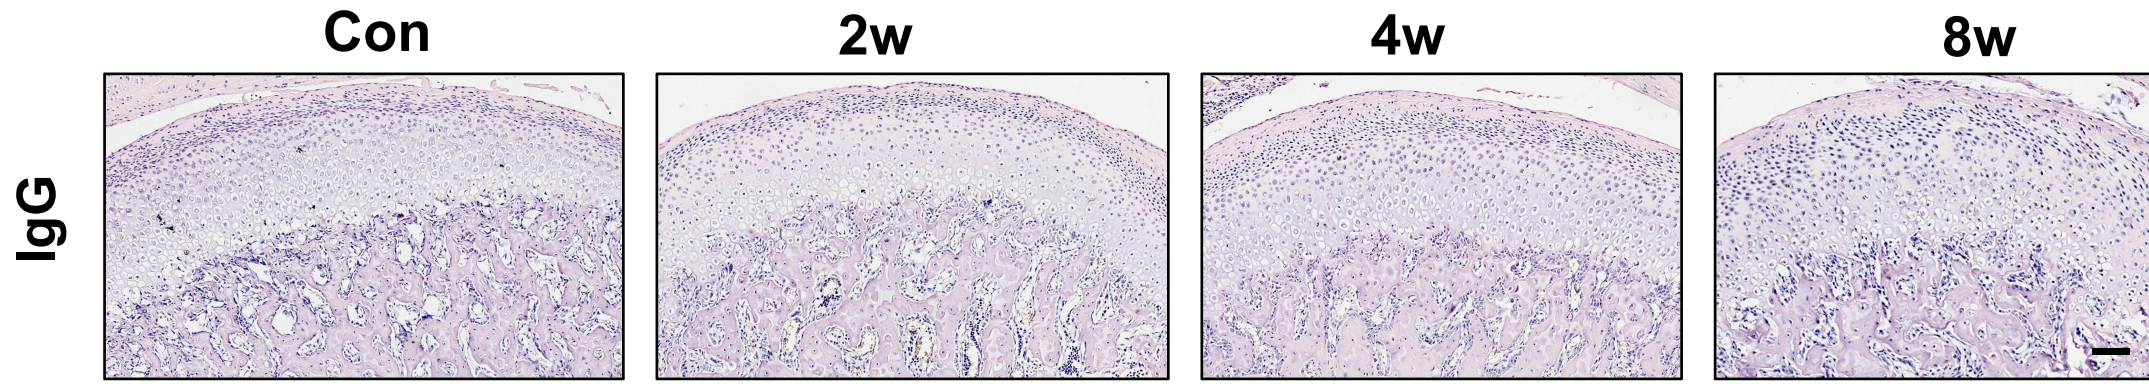

Supplemental data: IHC negative control images with isotype-matched immunoglobulin control in sagittal sections of the TMJ mandibular condylar cartilage layers. Scale bars: 50  $\mu$ m. N=4.
